# Supplementary material for: The miR156-Targeted SQUAMOSA PROMOTER BINDING PROTEIN (PmSBP) Transcription Factor Regulates the Flowering Time by Binding to the Promoter of SUPPRESSOR OF OVEREXPRESSION OF CO1 (PmSOC1) in Prunus mume
Source: MDPI journal article supplement (doi:10.3390/ijms231911976), 2022-10-09
Supplement: s1 [file s1]

## Supplementary Data S1

The cloned promoter sequences of *PmSBP1/6* and *PmSOC1s*

> *PmSBP1-promoter*

ATTGATGAATGCATAGATTGACAGAGAGGGAGAGAGAGAAGGGTAGTTTCTAAAGTAGTGGTAGTGAGA  
GAGTGATAAAGGTGGTGAATGTGGAGGGGGTAGTGAAAAGCAGACACCTGACAATGGCCCATGCCAGCT  
CTGAGCCTCTTAGAGAGAGAAAAGAGAGAGGGCTTTGTTGGTGCAAAATGTGTGTGTGAGAGTGAGAGAG  
TGAGGTACACTGAAAGACTCTGACTGTACAAAAATAATGGAGCAAAACAGCAGAATAGAGAGAGAGA  
GACGAATGAATGGATGGGTGCTTTATGGAGCTATCCCTCTCTCTCTCTCTCTCTCTGAGCCACTCAGCT  
TTACAAGAAGCTCCTTTCCTGCTAGCTCTCTCTCACCTGTTTGTGTTTTTTTATACACAACCTTCTCTCTTTT  
GAAAGATTTTATAAGCTTTTCCCTTTGCTGGTTATGGTATGGATATGGGTGCCCATCTCATGATGCATGGT  
GCCCATCGTTTCCCATTAGCTGGTGCCAAATGTCTAATTTGCCCTGCTTTCTAGATTATTGTGTTTACATTA  
TGATTTACCCCGAGATATAAGAAGGATAATACATATGAGTGACTAAAAGATCTCAAATTTGGTTGATTGTTT  
TTTCATAGAGGATCTTTAAATGATTATTTAAAAAATAAACACTTGGAATTATAATATGTGAATAGGGAAAA  
TTTGATAATTCCAATGTGGGGGACAAGGAGGTACCCAAGTGACAAAGGCATTGTCCTTATAAGAAAGTCT  
CTATTGCATCTCGTATCAATTACCGACTAGTCATTTTCAAATTGATTCAGTAATAAACTTCATAAACCGCAT  
AATCAAATTCCTAAATAATCTAAAAATGTAATTTCTCTAGCATTACTCTTAATTGAGTCACAACACAAA  
AGAATTATTATTATTTTATTTAGGTAGAAGTACAACAGGATTTGGTAGTTGATTAGTACGAGTTAGTTGGTT  
AATTAAAGAAAATAAAAGATGGTAGATGGTAGGATCTATATGCATAGAAGACTGCTGGTCTATATATAGTG  
AAGTTAATGCTGTCCGTACATTAATAAGCTGTATCTATGCTTGTAGTGTTAGTCTTGTTTTGGTCAATGATGT  
TTGGTTGTTACTAACCTGTTTTGGGTGGCACACACTCGTGTTTTCTTAAAAGGGTCACAAATTCATTAGATA  
AAGCTTTGATGTACTTGAGTAGGACCTTCACTCATATGCCTGCAACTATTCAATTAGGTAAAAACAAAA  
TCACGTAATGCAATTGGTTTATTTGAACATTTGAATTTCTAATTAGGGAAGGTAGTTACCAAGGTGGATAA  
AGGCATCTGAGGT

> *PmSBP6-promoter*

AAGGCAAGAAATAATGAGAGAGAAAGAGAGATGGAAGAGTCAAAGAAGAAGAAGACTAAGACTAAA  
ACATTGATATAGGAAAGGGTTTTGGAAAAGAAAGAGATTTATGCGCGAGGACCACAAGTTCCAAATGTT  
CTCTTGTCACCACAAGGATAACAGTGAATGGTAGCTAGAAGCCTACAAAAGCCAAAGCTAAGCTCATTT  
CCTCCAACAAAACCACATCATCATGTACATGATGTGTACAGCTACAACAACACAACAACAGGCACCAAC  
TCTTTTACTGTAACTTTAATTCACATAGACATATTCACATGGTGGCTATTGCACTATCTAATTCGTTTTTAGG  
ATAGGTTTTGTGTCTAATCCAATCATGGAGCAAAGGGAATTAACACTTGTCCAATATTGGTTGAACAACC  
CAATATTGTTGTACAAATGGGATTTGATTTACAGGGAGATTCAATAAGTATTTAAGTTAAGGATTTTTATA  
TATTTCTAATCTTAGTTGTCGGATTGCATTCATTAGATGTGTTGATAGATTAAATATGTAACATACATACATG  
CAATCCAACAATCGAGATTAGAAATATGTAACCAATATCCTTATCGGAGAATTTTCCTTGATTTACATATCT  
GTCATTTTGCTAGAAACCTGAAACCGAATAAGCCAGTCAGTCAGTGAATCATATAAATATACAGGGTTAG  
GTTTAAGTATATAGATTATATATATTTCCGAGGCAAGAAAGAAATGCAGTTGAGGCTTTGTCCTTATAATAG  
TTGACAGTCCTTTTCTTGAGAGCGCGACTATTCCTTCATCCACAATGTATTATTGGAAAGTGAAAGGTGAA  
AAGAAAACCCTACCTATATGGTCCAATGATGTAAGGAGAGAGCCCTATCATGCTTTGACACATATGGTAC  
TATTATCTATTATTTATGTCCTTGAATCTCATATTTGTTGGCCCTTCTTTCCTTTCCTTTGTTTTTACACTAAC  
ATTATGGTGTTAGCCAACCTGGTTTGCAGCAAACAAAGTGGCCAATTTCTGTTACCAATTTATGTCAATTGT  
TGCTAGCAAGCAGCTTGACCACACTTTCATACGTTGCAATTTATAAATATTGGTCCCAATATGTACGACC  
CAAGACAAGAGCTACCGCTAGCATGTTTTTTTCTGCAACATGGACAGGATGCATGGTTTAATTACCAATTA  
ATCAACTATTATCCAAGTTTTAATTACTAATTAGTATGAAAGTTCAATGTATATATAAACAGAGTTTGGAAT  
TTGAAAACCTCTAAAAGTGGGATGTGAAATAAAAGTCAGTGAAGTTATCGAGTCGGGAAAAAGTTGTTGC  
CGTAAGGTATAATTGAGTAGAATCTAGTGGAGGAGCCTTTTGAAGAAAGGACAGCATGCATCATGGTTTC  
ACGCATCTCATAAGGAGGCCACAACCTTCTATCTAGGGAAATTTTTTATATGTTTCGAGATGGGACATGC  
GGAAATATTCTATAACCAAAATTACTCATGTTTAAGACGGTAAATTGGTTCTATACAATAGTTGGAGTTTCA  
GTACGACTCGCATTTGGCTCGTTTGGTTTCAAAATAAGCCGAGCTGAGTTGAGCTTGAAAAAATCATTT  
TGACCCAACTTAAGAACTTTGGTATTTGATCTCCCAGAATTTGATTTTGGTTTTGGTCTCATTATGTATAT

ACTAGCACTCCTGCACTAGAAAGAACTTGAAGCCCTAATATTGACCAGCTAATCCACTAGATA

> *PmSOC1-1-promoter*

TAACAGAAGGAAGCGCTCTCAGCTTTCCTGTCACAAATCTATTCAGAACCCAATGTGTCAAAAAGTGAT  
GAGAGTTGAGAAGAAGGTGAAGAAGTTAATTGAATCTTACCCAATAGGTAAAATTAACCCAAGAAGCTT  
TTTTTGGGTTTGTGTTTGTGGAAGAGAGAGGTTTGTGACTTGTGGGTAGGACTTGGAAGATGATAAAGAT  
GAGGTAAATATATTGGATCCTCTTCTTCAATTCAAATAAGCAATCAATATATAGAATTTGTGTAAAGGAA  
ATATGAGTTCCTTAAGTTCCTTAATCAAAATGAAGATATGAAGGAGAGAGAGAGAGAGAGAGAGAGAGA  
GAGAGAGAGAGGCAAAGGGGAAGAATTGAGTGTTAAGAAATTGGCCCCAAATAGCCTCTTGTTACAA  
ACAAAAGAAGGAAGAAGAAGCCCCAAAATGGAAAGAAAAGAACTAAAAGAGACCTTCTCAGGTTTGT  
GAGCAAAGACTTGGACTAGACCCTGAAAAATACAAATATATATATATATATATTACATATAATAGGTGG  
GTTTTTGTGATTGATTGATTCAACTCCGAGAACCAAAAGACAAAGCAAAACAGAAAACCTTCTTCAGCTC  
AAATCTCCTCAACAAGCTAAAAAAGGAAAAACAGAGTTCAAGAGAAGCTGAGCCAATTTTCCAAATAT  
GCAAAAGGAAACCCAGAAAGAAGCTATGGACAAATAAGGGAGGAAGAAGATGCCAAAGAAGGAAAG  
AGAGAGAGAGAGAGAGATGAGGAGGATTGAGAGAGGGAAACCACAAAGACCCAGAAATTATAGAGA  
GAGTAGGAAGGAAGATTTTGA

> *PmSOC1-2-promoter*

AGAGATGAATAAAAACGAAAGCCATTTTTTTATTCCCAATGCGGTTTCCGAAAAAGATGAATAAAAAAA  
AATATTCCCTCTTTTACTTCTTTGTTTCTTAATTTTGCCAAAAAAGAGAAGCCATGAGCATTAAAGTAGTGT  
TTTATCTAATATTTTCACTGCGTTTTCTTTCCTCTAATTCTTATCCCTTCTTTTTTAGTGGGGTAGAATTTAA  
AGACAAAAGAAGGCATAGAGAATAATGGCAGTGAGTTATCGATCAATATGAAAAAAGGGGTCTGGTG  
GCCTGAGGATAAAGAAATCGGAACATCCACAATCAGATAAAAAGAAAGTTCTTCCCTTCTGCACTGCAC  
TGTGGACTATTTCTAGGGTTTCTGATCTATTTTCCATATTTGTATTCTATCATACTCCTATACCCTCGTGTTGT  
GTCCTTTGTGCTCTTTTTGGGTAATTCATGTCTATGGGTGGCGTCTCTGGGTCTATTTTTAGAAATCTAAT  
TTAACATATCTTTTTTGGGGGCTTTCTTTTATGAATCCTCCTGGGGTTTCATCTGCTAATTGCTTCTTCAGAG  
CCAAAGTCTGATACTTTGTTTGGATTTTCTAACTAAACCTCTCCTGGGTTTGCTTGGTTGTCAAAGGTCCT  
TCACAAATTTCTACATTTTCTCTACTAGCTAGTGTTGAGCACTTCAAATCTTCGAGGGGGTTTCCAGGT  
GTAATCTTCTCTACTAGCTTATTTCTTGAGCTATATACATGTATAGCGCATCTTTACCAATTTTCATGGTATT  
ATTACTTTTATTATTATCATCTCACGATGATCTTGTAATTAATGATGGCGATGATCTAGGCT

> *PmSOC1-3-promoter*

CCGCTTCCAAACAAAGAAAAGCCCCAGAAAATCAAATGGTTTCCAAAACCCAGAAAAGAAAAGAAAA  
AAGGATGAAGAAAGGTTTCCAAAAATAGAAAGGGGGCAGACCAAAATCCAAGATAGATATATGTGAAA  
CGGAGAAATCCCAGAAACCCTAGGGGAAAATTTGAGGAGAGAGATGAAGAAGGGGGAGGAGGAAGAT  
CAACAAAAAATTGATGGATTTGCCCTACTTGCTTCTTTCCCTTTTTAGGTTTCAAAGTCTACAAGAGAGAA  
CCCTATGAGGTATATTTGAGGTAATATAAAAAGATGGAATAAAATGAAAAAGGAAAGGAGGACATCAAC  
CCAATCTACAACCCCTTTCTTTTTTTGGCAATTAATGGACACCTCCCCATAAAGAAAAAAAACAAGAGAA  
TAAATGCCTAAGGCTGAGCTTAGCTTACACATGCGAAGCCACTTACTATTCCTCCACCCAATGGTAAAAA  
TAAATATATTAAAAACCTTTATTGGAGGCACACAACTCTGTGCTATCAAGTCTTTTGGTGACACGTGTGT  
AAAGTGACTGACAACCCTCTGTGGCCGGTGACTGTTTGAGCGGGCAGAGAGGCGCTTGAAAGCTAAAA  
CAGCGAACATTCTGTGCGTTGCCAGTTAAATTCAGACAGTCGATATAACCCCAAAGTTGCAGGTAAAT  
TTGGGGCATCGGATGGGCACAGTAAAAAAATTCTGTAAATAATGACTTGTCCGTACAATGGTTGAGATCT  
CCTAGCAAAAAAAAATGACAAGGCAATTTTCCGTACGATTGATAGAAGAGATGGGCTAATGGGGTGATG  
CCACATGCCGCCAGAACTCAACACATCACGG
