# Supplementary material for: The miR156-Targeted SQUAMOSA PROMOTER BINDING PROTEIN (PmSBP) Transcription Factor Regulates the Flowering Time by Binding to the Promoter of SUPPRESSOR OF OVEREXPRESSION OF CO1 (PmSOC1) in Prunus mume
Source: MDPI journal article supplement (doi:10.3390/ijms231911976), 2022-10-09
Supplement: s1 [file s1]

## Supplementary Tables

**Supplementary Table S1.** The primers designed by Oligo7.

| Primer name           | Sequences 5'-3'                                        | Used for                |
|-----------------------|--------------------------------------------------------|-------------------------|
| <i>PmSBP1</i> -F      | ATGACAATTATGGAAATGGGC                                  | gene clone              |
| <i>PmSBP1</i> -R      | TTAAAGTGACCAGTGAACATG                                  |                         |
| <i>PmSBP6</i> -F      | ATGGAATCAAACAGAGCTCATGGG                               | promoter clone          |
| <i>PmSBP6</i> -R      | TCATTCTCCATGATATTCAGAGGAGGTTT                          |                         |
| <i>PmSBP1</i> -2M-F   | ATTTACTGAATTGTGCTCTC                                   |                         |
| <i>PmSBP1</i> -2M-R   | TGTCATTTACAGCCCATT                                     |                         |
| <i>PmSBP6</i> -2M-F   | CACCGAATGTGTTTTTGCCTCA                                 |                         |
| <i>PmSBP6</i> -2M-R   | TTTGGAGAAAATTAGGAGAGAAGGCAAG                           |                         |
| <i>PmSOC1</i> -1-1M-F | TCAAAATCTTCCTTCCTACTCTC                                |                         |
| <i>PmSOC1</i> -1-1M-R | TAACAGAAGGAAGCGCTC                                     |                         |
| <i>PmSOC1</i> -2-1M-F | AGAGATGAATAAAAAACGAAAGCCA                              |                         |
| <i>PmSOC1</i> -2-1M-R | AGCCTAGATCATCGCCAT                                     |                         |
| <i>PmSOC1</i> -3-1M-F | CCGTGATGTGTTGAGTTCT                                    | vector                  |
| <i>PmSOC1</i> -3-1M-R | CCGCTTCCAAACAAAGAA                                     |                         |
| <i>gus-SBP1</i> -2M-F | TTATCGATACCGTCGACATTTACTGAATTGTGCTCTC                  |                         |
| <i>gus-SBP1</i> -2M-R | TGACCACCCGGGGATCCTGTCATTTACAGCCCATT                    |                         |
| <i>gus-SBP6</i> -2M-F | GCTTATCGATACCGTCGACCACCGAATGTGTTTTTGCCTCA              |                         |
| <i>gus-SBP6</i> -2M-R | ACTGACCACCCGGGGATCCTTTGGAGAAAATTAGGAGAGAA<br>GGCAAG    |                         |
| <i>my-SBP1</i> -F     | GTCGACATTTAAATACTAGTATGACAATTATGGAAATGG                |                         |
| <i>my-SBP1</i> -R     | AGCTTTTGCTCCATGGTACCAAGTGACCAGTGAACATGCT               |                         |
| <i>pc-SBP6</i> -F     | ACGGGGGACTCTTGACCATGGATGGAATCAAACAGAGCTCA<br>TGGG      |                         |
| <i>pc-SBP6</i> -R     | GGGAAATTCGAGCTGGTCACCTCATTCTCCATGATATTCAGA<br>GGAGGTTT |                         |
| <i>gus-PmSBP1</i> -F  | CGGGGGACTCTAGAGGATCCATGACAATTATGGAAATGGGC              | 35S: <i>PmSBP1</i> -GUS |
| <i>gus-PmSBP1</i> -R  | GACTGACCACCCGGGGATCCTTAAAGTGACCAGTGAACATG              |                         |
| <i>pAi-OC2-B1</i> -F  | AAGCTTGAATTCGAGCTCAGCTTATTTCTTGAGCTAT                  | pAbAi-Bait              |
| <i>pAi-OC2-B1</i> -R  | ACATGCCTCGAGGTCGACTTAATTACAAGATCATCGTGAG               |                         |
| <i>pAi-OC2-B2</i> -F  | AAGCTTGAATTCGAGCTCTTCTATCATACTCCTATACCCT               |                         |
| <i>pAi-OC2-B2</i> -R  | ACATGCCTCGAGGTCGACAGATTTCTAAAAATAGAACCC                |                         |

|              |                                            |               |
|--------------|--------------------------------------------|---------------|
| pAi-OC2-B3-F | AAGCTTGAATTCGAGCTCATTCCCTCTTTTACTTCT       |               |
| pAi-OC2-B3-R | ACATGCCTCGAGGTCGACGAAAGAAAACGCAGTGAA       |               |
| pAi-OC3-B1-F | AAGCTTGAATTCGAGCTCGCCTCCAATAAAGGTTTT       |               |
| pAi-OC3-B1-R | ACATGCCTCGAGGTCGACATAAATGCCTAAGGCTGA       |               |
| pAi-OC3-B2-F | AAGCTTGAATTCGAGCTCGCATGTGGCATCACCCCA       |               |
| pAi-OC3-B2-R | ACATGCCTCGAGGTCGACTGTCCGTACAATGGTTGAGA     |               |
| AD-SBP1-F    | ATGGAGGCCAGTGAATTCATGACAATTATGGAAATGG      | pGADT7-PmSBP1 |
| AD-SBP1-R    | CTCGAGCTCGATGGATCCTTAAAGTGACCAGTGAACATG    |               |
| AD-SBP6-F    | ATGGAGGCCAGTGAATTCATGGAATCAAACAGAGCTCATGG  | pGADT7-PmSBP6 |
|              | G                                          |               |
| AD-SBP6-R    | CTCGAGCTCGATGGATCCTCATTCTCCATGATATTCAGAGGA |               |
|              | GGTTT                                      |               |

**Supplementary Table S2.** Details of the *cis*-acting elements of the promoter sequences of *PmSBP1/6*.

| Gene name     | <i>cis</i> -acting |                 |        |                         |
|---------------|--------------------|-----------------|--------|-------------------------|
|               | elements           | Sequences 5'-3' | Amount | Function                |
| <i>PmSBP1</i> | TCT-motif          | TCTTAC          | 1      | light response          |
|               | LAMP-element       | CTTTATCA        | 1      | light response          |
|               | CAG-motif          | GAAAGGCAGAC     | 1      | light response          |
|               | Box 4              | ATTAAT          | 2      | light response          |
|               | G-box              | CACGAC          | 2      | light response          |
|               | TCCC-motif         | TCTCCCT         | 1      | light response          |
|               | GT1-motif          | GGTTAAT         | 1      | light response          |
|               | TCA-element        | CCATCTTTTT      | 1      | salicylic acid response |
|               | ABRE               | ACGTG           | 1      | abscisic acid response  |
|               | ARE                | AAACCA          | 2      | anaerobic induction     |
|               | GARE-motif         | TCTGTTG         | 1      | gibberellin response    |
|               | GCN4_motif         | TGAGTCA         | 2      | endosperm expression    |
| <i>PmSBP6</i> | LAMP-element       | CTTTATCA        | 1      | light response          |
|               | Box 4              | ATTAAT          | 1      | light response          |
|               | TCCC-motif         | TCTCCCT         | 1      | light response          |
|               | AE-box             | AGAAACTT        | 1      | light response          |
|               | chs-Unit 1 m1      | ACCTAACCCGG     | 1      | light response          |
|               | ACE                | GACACGTATG      | 1      | light response          |
|               | GATA-motif         | GATAGGG         | 1      | light response          |
|               | ATCT-motif         | AATCTAATCC      | 1      | light response          |
|               | MRE                | AACCTAA         | 1      | light response          |
|               | GA-motif           | ATAGATAA        | 1      | light response          |
|               | ARE                | AAACCA          | 5      | anaerobic induction     |

|         |            |   |                               |
|---------|------------|---|-------------------------------|
| MBS     | CAACTG     | 2 | drought-inducibility          |
| P-box   | CCTTTTG    | 1 | gibberellin-responsive        |
| O2-site | GATGATGTGG | 1 | zein metabolism<br>regulation |
| CAT-box | GCCACT     | 1 | meristem expression           |

---
